# Supplementary figures and images for: Contraction-induced endocardial id2b plays a dual role in regulating myocardial contractility and valve formation
Source: eLife journal article supplement (doi:10.7554/elife.101151), 2024-09-11

IB: anti-Flag

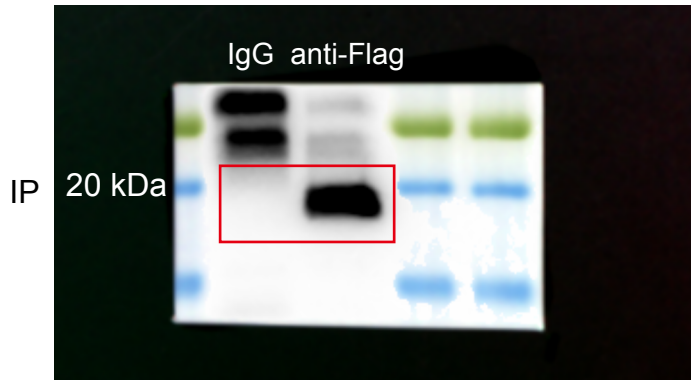

IB: anti-HA

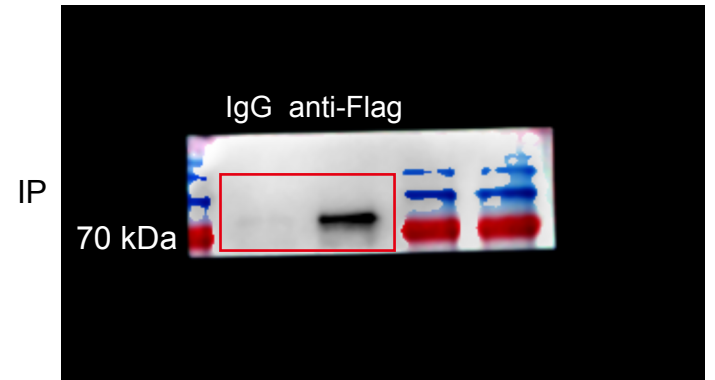

IB: anti-Flag

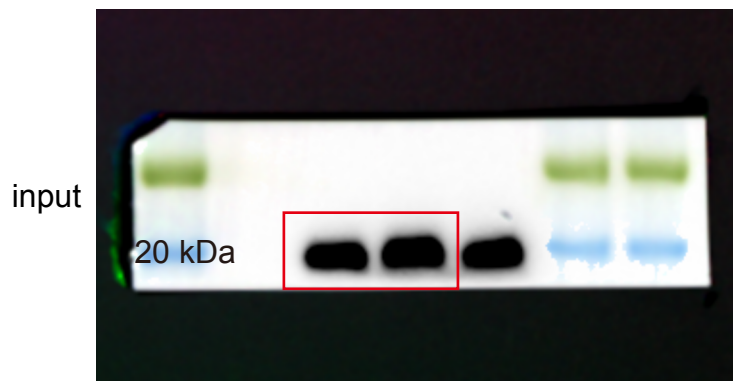

IB: anti-HA

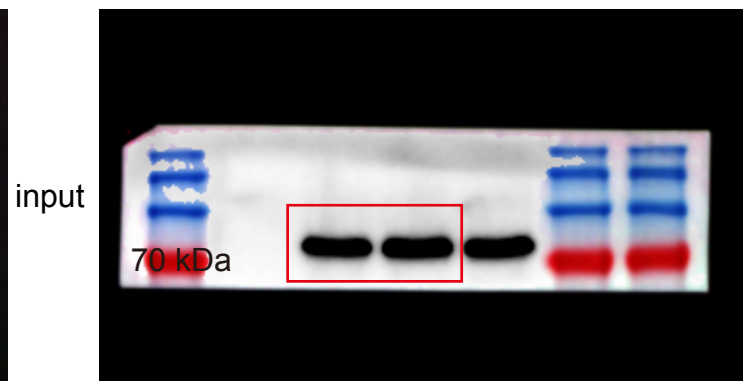

Supplement: fig7-data1 [file source data 1.pdf › source data 1.pdf]
